# Supplementary material for: Comparative Evaluation of the Antioxidative and Antimicrobial Nutritive Properties and Potential Bioaccessibility of Plant Seeds and Algae Rich in Protein and Polyphenolic Compounds
Source: MDPI journal article supplement (doi:10.3390/app12168136), 2022-08-14
Supplement: s1 [file s1]

Supplementary Materials

# Comparative Evaluation of the Antioxidative and Antimicrobial Nutritive Properties and Potential Bioaccessibility of Plant Seeds and Algae Rich in Protein and Polyphenolic Compounds

**Table S1.** Content of essential and relatively essential amino acids (g/100 g protein) in analysed raw materials.

| Raw material  | Essential amino acid                 |                        |                        |                        |                         | Relatively essential   |                        |                        |                        |                         | $\Sigma_{\text{eaa}}$    |
|---------------|--------------------------------------|------------------------|------------------------|------------------------|-------------------------|------------------------|------------------------|------------------------|------------------------|-------------------------|--------------------------|
|               | Thr                                  | Val                    | Met                    | Ile                    | Leu                     | Phe                    | Lys                    | Ser                    | His                    | Arg                     |                          |
| Black cumin   | 3.77±0.14 <sup>e</sup>               | 4.26±0.34 <sup>e</sup> | 0.76±0.12 <sup>h</sup> | 3.18±0.22 <sup>h</sup> | 5.27±0.32 <sup>g</sup>  | 3.65±0.32 <sup>h</sup> | 3.90±0.57 <sup>e</sup> | 4.20±0.32 <sup>e</sup> | 2.54±0.16 <sup>d</sup> | 7.64±0.87 <sup>d</sup>  | 39.16±2.82 <sup>f</sup>  |
| Milk thistle  | 4.01 <sup>c</sup> ±0.10 <sup>c</sup> | 5.13±0.23 <sup>c</sup> | 1.27±0.18 <sup>f</sup> | 4.03±0.07 <sup>e</sup> | 6.10±0.70 <sup>e</sup>  | 4.59±0.12 <sup>e</sup> | 4.71±0.17 <sup>c</sup> | 5.22±0.34 <sup>a</sup> | 2.64±0.40 <sup>d</sup> | 10.59±0.41 <sup>c</sup> | 48.28±2.50 <sup>b</sup>  |
| Fenugreek     | 3.74±0.29 <sup>e</sup>               | 3.96±0.40 <sup>f</sup> | 1.03±0.27 <sup>g</sup> | 4.77±0.32 <sup>a</sup> | 6.70±0.56 <sup>c</sup>  | 4.57±0.15 <sup>e</sup> | 6.76±0.81 <sup>a</sup> | 4.91±0.54 <sup>b</sup> | 2.80±0.34 <sup>c</sup> | 10.40±1.32 <sup>c</sup> | 49.65±4.45 <sup>a</sup>  |
| Almonds       | 2.62±0.76 <sup>f</sup>               | 3.72±0.60 <sup>g</sup> | 0.39±0.32 <sup>i</sup> | 3.08±0.59 <sup>i</sup> | 5.69±0.88 <sup>f</sup>  | 5.10±0.75 <sup>c</sup> | 2.64±0.48 <sup>f</sup> | 3.50±0.74 <sup>h</sup> | 2.33±0.50 <sup>e</sup> | 11.16±0.35 <sup>b</sup> | 40.23±5.43 <sup>f</sup>  |
| White sesame  | 3.82±0.73 <sup>d</sup>               | 4.69±0.69 <sup>d</sup> | 1.50±0.32 <sup>c</sup> | 3.65±0.60 <sup>f</sup> | 6.47±1.16 <sup>d</sup>  | 4.85±0.88 <sup>d</sup> | 2.72±0.41 <sup>f</sup> | 4.56±0.73 <sup>d</sup> | 2.75±0.40 <sup>c</sup> | 12.87±1.48 <sup>a</sup> | 47.88±7.34 <sup>bc</sup> |
| White mustard | 4.25±0.53 <sup>b</sup>               | 4.63±0.45 <sup>d</sup> | 1.50±0.38 <sup>c</sup> | 3.45±0.34 <sup>g</sup> | 6.32±0.63 <sup>d</sup>  | 3.96±0.50 <sup>g</sup> | 5.75±0.65 <sup>b</sup> | 3.86±0.40 <sup>g</sup> | 2.83±0.38 <sup>c</sup> | 5.57±1.18 <sup>f</sup>  | 42.11±4.26 <sup>e</sup>  |
| Star anise    | 3.72±0.04 <sup>e</sup>               | 4.74±0.11 <sup>d</sup> | 1.37±0.02 <sup>e</sup> | 4.13±0.09 <sup>d</sup> | 6.50±0.02 <sup>c</sup>  | 5.62±0.06 <sup>b</sup> | 4.38±0.02 <sup>d</sup> | 4.71±0.06 <sup>c</sup> | 3.77±0.03 <sup>b</sup> | 6.89±0.02 <sup>ef</sup> | 45.83±0.04 <sup>c</sup>  |
| Eggfruit      | 4.42±0.17 <sup>a</sup>               | 5.39±0.14 <sup>b</sup> | 2.64±0.11 <sup>a</sup> | 4.56±0.23 <sup>b</sup> | 6.33±0.19 <sup>de</sup> | 6.62±0.20 <sup>a</sup> | 3.98±0.12 <sup>c</sup> | 5.22±0.19 <sup>a</sup> | 4.82±0.22 <sup>a</sup> | 4.14±0.11 <sup>g</sup>  | 48.12±0.91 <sup>b</sup>  |

---

|           |                        |                        |                        |                        |                        |                        |                        |                        |                        |                        |                          |
|-----------|------------------------|------------------------|------------------------|------------------------|------------------------|------------------------|------------------------|------------------------|------------------------|------------------------|--------------------------|
| Spirulina | 4.30±1.33 <sup>b</sup> | 5.62±1.43 <sup>a</sup> | 1.70±0.76 <sup>b</sup> | 4.45±1.80 <sup>c</sup> | 7.26±1.70 <sup>b</sup> | 3.95±1.66 <sup>g</sup> | 4.19±1.36 <sup>d</sup> | 4.13±1.13 <sup>e</sup> | 1.51±1.02 <sup>f</sup> | 7.13±1.41 <sup>d</sup> | 44.24±12.25 <sup>d</sup> |
| Chlorella | 4.53±0.53 <sup>a</sup> | 5.71±0.56 <sup>a</sup> | 1.45±0.66 <sup>d</sup> | 4.43±0.64 <sup>c</sup> | 8.03±0.95 <sup>a</sup> | 4.39±0.44 <sup>f</sup> | 4.90±0.69 <sup>c</sup> | 4.07±0.50 <sup>f</sup> | 1.81±0.47 <sup>f</sup> | 6.42±1.20 <sup>f</sup> | 45.75±5.58 <sup>c</sup>  |

---

values are means ±SD of two determinations; a-j – the same letter in column mean homogenous groups

Amino acids abbreviations: Thr – threonine; Val – valine; Met – methionine; Ile – isoleucine; Leu – leucine; Phe – phenylalanine; Lys – lysine; Ser-serine; His – histidine; Arg – arginine;  $\Sigma_{\text{aaa}}$ - sum of essential and relatively essential amino acids

**Table S2.** Content of non-essential and relatively non-essential amino acids (g/100 g protein) in analysed raw materials and accepted patterns.

| Raw material  | Non-essential amino acid |                                       |                         |                         | Relatively non-essential |                        |                        | $\Sigma_{\text{neaa}}$   |
|---------------|--------------------------|---------------------------------------|-------------------------|-------------------------|--------------------------|------------------------|------------------------|--------------------------|
|               | Asp                      | Glu                                   | Pro                     | Gly                     | Ala                      | Cys                    | Tyr                    |                          |
| Black cumin   | 7.46±0.70 <sup>e</sup>   | 21.01±0.42 <sup>b</sup>               | 3.30±0.33 <sup>e</sup>  | 5.66±0.23 <sup>ab</sup> | 3.79±0.35 <sup>g</sup>   | 1.24±0.35 <sup>a</sup> | 2.95±0.32 <sup>c</sup> | 45.41±1.02 <sup>c</sup>  |
| Milk thistle  | 9.70±0.30 <sup>c</sup>   | 21.26±0.24 <sup>b</sup>               | 4.07±0.91 <sup>c</sup>  | 5.59±1.04 <sup>b</sup>  | 4.35±0.19 <sup>d</sup>   | 0.91±0.38 <sup>b</sup> | 3.25±0.52 <sup>b</sup> | 49.13±2.36 <sup>b</sup>  |
| Fenugreek     | 10.74±1.14 <sup>b</sup>  | 17.65±0.52 <sup>d</sup>               | 4.34±1.49 <sup>bc</sup> | 4.90±0.50 <sup>e</sup>  | 3.93±0.48 <sup>f</sup>   | 0.74±0.04 <sup>c</sup> | 2.56±0.69 <sup>d</sup> | 44.87±4.57 <sup>cd</sup> |
| Almonds       | 10.00±0.99 <sup>b</sup>  | 25.63±2.19 <sup>a</sup>               | 3.79±0.96 <sup>d</sup>  | 5.84±0.77 <sup>a</sup>  | 3.92±0.44 <sup>f</sup>   | 0.76±0.19 <sup>c</sup> | 2.25±0.44 <sup>d</sup> | 52.18±5.75 <sup>a</sup>  |
| White sesame  | 8.28±0.13 <sup>d</sup>   | 19.76±2.88 <sup>c</sup>               | 2.66±0.51 <sup>f</sup>  | 5.05±0.82 <sup>d</sup>  | 4.62±0.73 <sup>c</sup>   | 1.25±0.12 <sup>a</sup> | 3.05±0.67 <sup>c</sup> | 44.67±5.73 <sup>cd</sup> |
| White mustard | 6.26±0.65 <sup>f</sup>   | 16.91±0.49 <sup>c</sup>               | 5.63±1.63 <sup>a</sup>  | 4.67±0.58 <sup>ef</sup> | 4.04±0.56 <sup>e</sup>   | 0.99±0.37 <sup>b</sup> | 2.33±0.44 <sup>d</sup> | 40.83±2.47 <sup>c</sup>  |
| Star anise    | 8.00±0.02 <sup>d</sup>   | 12.44±0.07 <sup>f</sup>               | 4.84±0.14 <sup>b</sup>  | 5.28±0.01 <sup>c</sup>  | 4.81±0.02 <sup>c</sup>   | 1.04±0.06 <sup>b</sup> | 3.02±0.02 <sup>c</sup> | 39.44±0.05 <sup>c</sup>  |
| Eggfruit      | 14.18±0.28 <sup>a</sup>  | 9.75±0.19 <sup>g</sup>                | 5.65±0.25 <sup>a</sup>  | 5.24±0.16 <sup>c</sup>  | 7.18±0.22 <sup>a</sup>   | 0.47±0.07 <sup>d</sup> | 4.09±0.12 <sup>a</sup> | 46.56±1.19 <sup>c</sup>  |
| Spirulina     | 8.51±2.36 <sup>d</sup>   | 12.13±0.80 <sup>f</sup>               | 2.89±1.05 <sup>f</sup>  | 4.35±1.92 <sup>f</sup>  | 7.02±1.18 <sup>a</sup>   | 0.32±0.12 <sup>c</sup> | 2.98±1.55 <sup>c</sup> | 38.21±6.60 <sup>f</sup>  |
| Chlorella     | 8.65±0.61 <sup>d</sup>   | 12.34 <sup>f</sup> ±0.58 <sup>f</sup> | 2.92±1.17 <sup>f</sup>  | 4.81±0.50 <sup>e</sup>  | 6.82±0.70 <sup>b</sup>   | 0.34±0.18 <sup>c</sup> | 2.94±0.68 <sup>c</sup> | 38.82±2.78 <sup>f</sup>  |

<sup>a,b,c,d,e,f</sup> – significant differences between the mean contents of individual amino acids, means denoted by different letters differ at  $p \leq 0.05$ .

Amino acids abbreviations: Asp – aspartic acid; Glu – glutamic acid; Pro – proline; Gly – glycine; Ala – alanine; Cys- cysteine; Tyr –tyrosine
